# Supplementary material for: Maternal psychological stress during pregnancy and newborn telomere length: a systematic review and meta-analysis
Source: Springer Nature journal article supplement (doi:10.1186/s12888-023-05387-3), 2023-12-15
Supplement: MOESM2 [file 26533460]

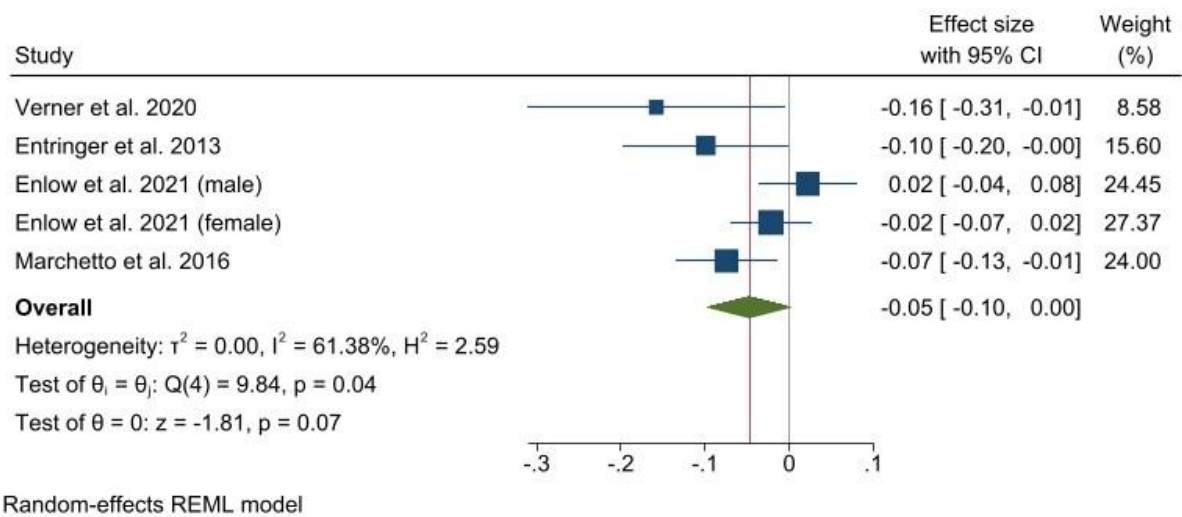

Figure S1. Forest plot of the overall result

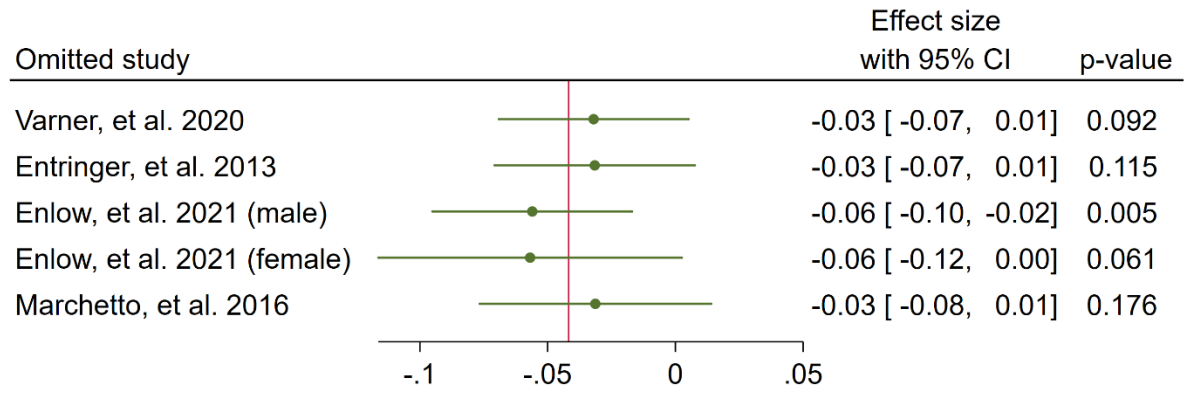

Random-effects ML model

Figure S2. Sensitivity analysis of included studies

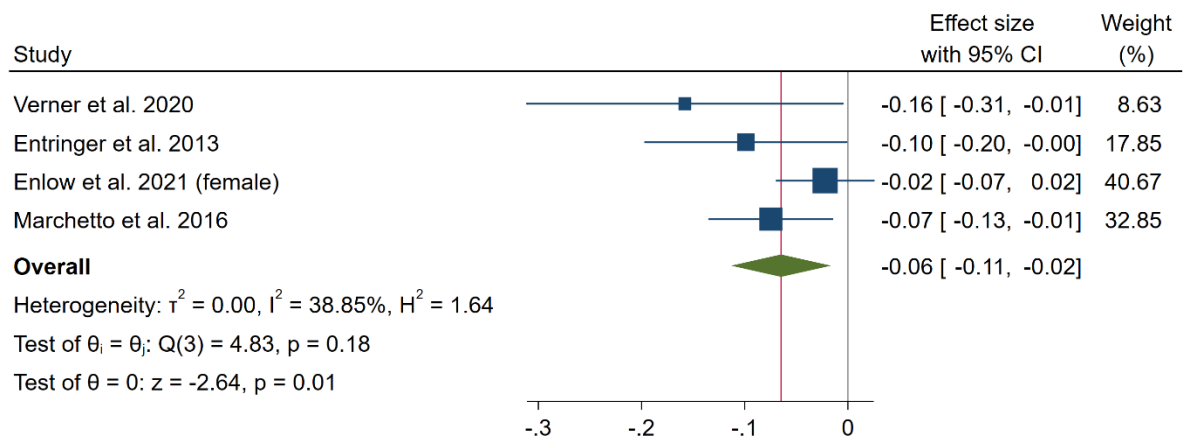

Random-effects REML model

Figure S3. Meta-analysis of all included studies after removing one study (Sensitivity analysis).
